# Supplementary material for: Active Faults sources of the Morelia-Acambay Fault System, Mexicobased on Paleoseismology and the estimation of magnitude M w fromfault dimensions
Source: Copernicus journal article supplement (doi:10.5194/nhess-2018-63), 2018-03-22
Supplement: Supplementary file 1 [file nhess-2018-63-supplement.pdf]

| Fault Name                  | Lenght (km) | Scarp (m) | X1     | Y1      | X2     | Y2      | Xm     | Ym      | Near locality name                         | Distance to fault (m) | Mw (Wells and Coppersmith, 1994) | Mw (Anderson et al., 1996) | Mw (Wesnousky, 2008) |
|-----------------------------|-------------|-----------|--------|---------|--------|---------|--------|---------|--------------------------------------------|-----------------------|----------------------------------|----------------------------|----------------------|
| Pastores F.                 | 38.096      | 243       | 421970 | 2196230 | 384870 | 2198191 | 403091 | 2194596 | Las Chivas (El Cerro)                      | 1113.23707738         | 6.95                             | 6.48                       | 6.86                 |
| Acambay-Tixmadejé F.        | 35.898      | 650       | 421041 | 2207466 | 386719 | 2212908 | 403734 | 2209029 | La Manga                                   | 361.40354768          | 6.91                             | 6.36                       | 6.85                 |
| Venta de Bravo F.           | 32.982      | 300       | 349419 | 2194624 | 380831 | 2195743 | 365004 | 2196609 | Santo Niño (Santa Ana)                     | 70.73349789           | 6.86                             | 6.39                       | 6.83                 |
| Jarácuaro-Pátzcuaro SEG     | 32.911      | 277       | 213075 | 2161467 | 245587 | 2157271 | 229285 | 2158940 | El Pinal                                   | 547.68201974          | 6.86                             | 6.39                       | 6.83                 |
| Los Copales(1) F.           | 28.531      | 100       | 255901 | 2211152 | 228861 | 2206815 | 242748 | 2208893 | Los Copales                                | 1195.28697594         | 6.78                             | 6.41                       | 6.80                 |
| Tarimbaro-Álvaro Obregón F. | 28.281      | 200       | 291439 | 2193684 | 264952 | 2185886 | 278496 | 2188616 | Rancho del Señor Tapia                     | 44.34053882           | 6.78                             | 6.34                       | 6.80                 |
| La Presa(1) F.              | 26.164      | 180       | 318441 | 2210001 | 343911 | 2211703 | 331135 | 2211879 | La Presa                                   | 1049.78010545         | 6.73                             | 6.31                       | 6.79                 |
| La Alberca-Teremendo F.     | 23.155      | 70        | 262781 | 2197892 | 241109 | 2191257 | 251706 | 2194699 | Santa Inés                                 | 1260.16382243         | 6.66                             | 6.33                       | 6.76                 |
| Epitacio Huerta F.          | 22.331      | 126       | 367540 | 2226089 | 389104 | 2220934 | 378225 | 2223249 | Yereje Canteras                            | 634.52415859          | 6.64                             | 6.26                       | 6.75                 |
| Charo-Queréndaro F.         | 21.518      | 80        | 278958 | 2181992 | 299282 | 2187470 | 289152 | 2184236 | El Cerrito                                 | 13.02575255           | 6.62                             | 6.29                       | 6.75                 |
| San Mateo F.                | 21.481      | 115       | 394620 | 2203417 | 415125 | 2200143 | 404964 | 2202428 | La Laguna                                  | 896.79235789          | 6.62                             | 6.25                       | 6.75                 |
| Morelia La Paloma F.        | 21.243      | 300       | 288191 | 2176705 | 267343 | 2177224 | 277705 | 2178158 | El Zapote [Entrada a las Mesas]            | 168.96941105          | 6.61                             | 6.16                       | 6.74                 |
| Puerto la Sosa F.           | 20.747      | 180       | 265656 | 2152339 | 279702 | 2167253 | 272720 | 2159760 | Puerto la Sosa                             | 266.18343138          | 6.60                             | 6.20                       | 6.74                 |
| La Rinconada F.             | 19.567      | 136       | 292276 | 2212232 | 310502 | 2215375 | 301574 | 2211900 | La Rinconada                               | 4294.28255669         | 6.56                             | 6.19                       | 6.73                 |
| El Negro F.                 | 19.328      | 141       | 339097 | 2210495 | 320174 | 2209236 | 329455 | 2210458 | El Negro                                   | 274.62813292          | 6.56                             | 6.18                       | 6.72                 |
| Los Bancos F.               | 19.126      | 125       | 355339 | 2206662 | 336461 | 2206484 | 345863 | 2206310 | Los Bancos                                 | 873.33311633          | 6.55                             | 6.19                       | 6.72                 |
| San José del Naranjo F.     | 18.826      | 93        | 228866 | 2207949 | 246519 | 2211468 | 237562 | 2210601 | San José del Naranjo                       | 442.41369187          | 6.54                             | 6.21                       | 6.72                 |
| Chucándiro(2) F.            | 17.712      | 150       | 258393 | 2200267 | 242136 | 2219493 | 250059 | 2197757 | Buнавista                                  | 2687.94645075         | 6.51                             | 6.13                       | 6.71                 |
| Huingo(1) F.                | 17.578      | 144       | 293584 | 2198966 | 310346 | 2200713 | 301797 | 2201143 | Huingo                                     | 3187.71646568         | 6.50                             | 6.13                       | 6.71                 |
| Queréndaro(1) F.            | 17.353      | 135       | 313982 | 2194824 | 298627 | 2190074 | 306835 | 2191136 | Ninguno                                    | 651.38826195          | 6.50                             | 6.13                       | 6.70                 |
| San Miguel Tumbastatiro F.  | 16.331      | 104       | 259518 | 2212079 | 244462 | 2210335 | 251873 | 2212049 | San Miguel Tumbastatiro                    | 1494.74109186         | 6.46                             | 6.12                       | 6.69                 |
| Indaparapeo SEG.            | 15.431      | 90        | 298153 | 2188221 | 313322 | 2189886 | 305845 | 2188034 | Jorio                                      | 4434.19085792         | 6.43                             | 6.11                       | 6.68                 |
| El Botín F.                 | 15.331      | 70        | 356512 | 2209723 | 371502 | 2211338 | 364049 | 2210021 | El Botín                                   | 527.32141673          | 6.42                             | 6.13                       | 6.68                 |
| San Ángel(2) F.             | 15.105      | 60        | 240934 | 2201565 | 254487 | 2207173 | 247809 | 2204167 | San Ángel                                  | 647.70129413          | 6.42                             | 6.13                       | 6.67                 |
| Temascalcingo F.            | 14.847      | 230       | 401336 | 2199975 | 387394 | 2204405 | 394027 | 2201193 | Barrio de Shelle                           | 2521.77946698         | 6.41                             | 6.01                       | 6.67                 |
| San Juan de Dios F.         | 14.588      | 81        | 348116 | 2235872 | 362562 | 2236101 | 355400 | 2235878 | San Juan de Dios                           | 1759.35254917         | 6.40                             | 6.09                       | 6.67                 |
| La Palma(5) F.              | 14.542      | 65        | 234641 | 2193659 | 220537 | 2194034 | 227620 | 2193829 | La Palma                                   | 2306.29882761         | 6.39                             | 6.11                       | 6.67                 |
| Puruagua F.                 | 14.345      | 150       | 345385 | 2212691 | 359583 | 2212372 | 352510 | 2212369 | El Tejocote de Puruagua                    | 1765.87169132         | 6.39                             | 6.03                       | 6.66                 |
| Cointzio F.                 | 14.295      | 100       | 267925 | 2173282 | 254099 | 2171642 | 260978 | 2173239 | Cointzio [Balneario]                       | 189.74456709          | 6.38                             | 6.06                       | 6.66                 |
| El Socorro F.               | 14.002      | 95        | 339250 | 2227330 | 325820 | 2226803 | 332516 | 2227582 | El Socorro                                 | 947.444391981         | 6.37                             | 6.05                       | 6.66                 |
| Chehuayo F.                 | 13.672      | 149       | 269934 | 2198709 | 282702 | 2201726 | 276052 | 2201072 | San Pedro                                  | 3730.36673916         | 6.36                             | 6.00                       | 6.65                 |
| Ichaqueo F.                 | 13.607      | 150       | 276215 | 2166813 | 287516 | 2171966 | 280891 | 2171363 | Cascadas de Ichaqueo [Parque Ecoturístico] | 198.34155457          | 6.36                             | 6.00                       | 6.65                 |
| Las Mesas(2) F.             | 13.478      | 112       | 249243 | 2220932 | 260757 | 2227133 | 255297 | 2223648 | Las Mesas                                  | 5818.89979764         | 6.35                             | 6.02                       | 6.65                 |
| Las Margaritas F.           | 12.947      | 95        | 295172 | 2219623 | 307457 | 2220207 | 301418 | 2220674 | Las Margaritas                             | 1853.02011670         | 6.33                             | 6.01                       | 6.64                 |
| Cuma F.                     | 12.828      | 170       | 240184 | 2202701 | 251900 | 2207183 | 245722 | 2205552 | Cuma                                       | 1605.56210349         | 6.32                             | 5.96                       | 6.64                 |
| Marritaro F.                | 12.664      | 115       | 321801 | 2192417 | 334208 | 2193509 | 328090 | 2192593 | Palomas San Isidro                         | 337.34839570          | 6.32                             | 5.99                       | 6.64                 |
| San Antonio(3) F.           | 12.648      | 154       | 293487 | 2213892 | 305453 | 2214973 | 299233 | 2216014 | San Antonio                                | 1094.50657476         | 6.31                             | 5.96                       | 6.64                 |

|                              |        |     |        |         |        |         |        |         |                                     |               |      |      |      |
|------------------------------|--------|-----|--------|---------|--------|---------|--------|---------|-------------------------------------|---------------|------|------|------|
| El Rancho(4) F.              | 12.410 | 140 | 289415 | 2230296 | 277878 | 2226401 | 283557 | 2228604 | El Rancho                           | 325.67298004  | 6.30 | 5.96 | 6.63 |
| La Codorniz(1) F.            | 12.068 | 115 | 224297 | 2206968 | 234280 | 2213662 | 229166 | 2210497 | La Codorniz                         | 8990.14230708 | 6.29 | 5.96 | 6.63 |
| Agua Fria F.                 | 11.816 | 150 | 323317 | 2189590 | 334917 | 2188621 | 329063 | 2188950 | Laguna Larga                        | 115.09239297  | 6.28 | 5.93 | 6.62 |
| Tultenango F.                | 11.601 | 50  | 390437 | 2192594 | 379074 | 2194004 | 384857 | 2193794 | Tultenango                          | 3191.63823528 | 6.27 | 6.02 | 6.62 |
| San Agustín F.               | 11.537 | 100 | 267140 | 2198598 | 277492 | 2203018 | 272169 | 2200953 | San Pedro                           | 1414.65556501 | 6.26 | 5.95 | 6.62 |
| Palomas F.                   | 11.460 | 54  | 355576 | 2209236 | 366905 | 2209376 | 361277 | 2208891 | Palomas                             | 2582.10332850 | 6.26 | 6.00 | 6.62 |
| Ampliación de Atotonilco F.  | 11.447 | 60  | 364362 | 2202663 | 375274 | 2205796 | 369888 | 2203897 | Ampliación de Atotonilco            | 416.59085670  | 6.26 | 5.99 | 6.62 |
| MI Rancho F.                 | 11.442 | 138 | 243538 | 2219855 | 253418 | 2224282 | 248316 | 2222150 | MI Rancho                           | 7008.10765624 | 6.26 | 5.92 | 6.62 |
| Los Zavala(1) F.             | 11.241 | 98  | 278643 | 2222966 | 289529 | 2225089 | 283996 | 2224376 | Los Zavala                          | 1029.05171802 | 6.25 | 5.94 | 6.61 |
| El Laurelito F.              | 11.054 | 130 | 274838 | 2172707 | 285583 | 2173675 | 280164 | 2173740 | El Laurelito (La Izama)             | 377.95719628  | 6.24 | 5.91 | 6.61 |
| Palo Blanco F.               | 10.880 | 92  | 277714 | 2196079 | 288100 | 2198845 | 282837 | 2197736 | Palo Blanco                         | 706.79575905  | 6.23 | 5.93 | 6.61 |
| Agua Blanca F.               | 10.759 | 100 | 207422 | 2212357 | 217769 | 2215073 | 212645 | 2213468 | Agua Blanca                         | 1043.52877519 | 6.22 | 5.92 | 6.60 |
| Matorio F.                   | 10.690 | 145 | 230291 | 2194805 | 239932 | 2198505 | 235130 | 2196381 | Matorio                             | 344.69059371  | 6.22 | 5.88 | 6.60 |
| El Puertecito F.             | 10.679 | 111 | 341536 | 2222661 | 351757 | 2222475 | 346741 | 2222334 | El Puertecito                       | 2399.47862267 | 6.22 | 5.90 | 6.60 |
| El Nopal F.                  | 10.597 | 67  | 268811 | 2208769 | 279122 | 2208975 | 274041 | 2209088 | El Nopal                            | 827.36730991  | 6.21 | 5.94 | 6.60 |
| Pamaseo(1) F.                | 10.452 | 90  | 255774 | 2219118 | 264616 | 2224136 | 260154 | 2221687 | Pamaseo                             | 1866.89502832 | 6.21 | 5.91 | 6.60 |
| El Reseco(2) F.              | 10.389 | 111 | 273022 | 2213905 | 263050 | 2212234 | 268072 | 2212595 | El Reseco                           | 1557.70305750 | 6.20 | 5.89 | 6.60 |
| La Chivería(2) F.            | 10.348 | 152 | 323139 | 2213549 | 333154 | 2214495 | 328141 | 2214022 | La Chivería                         | 1141.15993239 | 6.20 | 5.86 | 6.60 |
| El Nogal(1) F.               | 9.842  | 115 | 371947 | 2209061 | 381697 | 2208826 | 376854 | 2209079 | El Nogal                            | 3269.20101196 | 6.17 | 5.86 | 6.59 |
| La Purísima(2) F.            | 9.825  | 113 | 397278 | 2212856 | 387741 | 2214413 | 392572 | 2214155 | La Purísima                         | 8126.22390482 | 6.17 | 5.86 | 6.59 |
| Presa San Pedro Alto F.      | 9.799  | 50  | 399206 | 2201802 | 408255 | 2198614 | 403665 | 2199869 | Barrio de Shelle                    | 4850.99029245 | 6.17 | 5.93 | 6.59 |
| La Amargosilla F.            | 9.770  | 105 | 253097 | 2194186 | 261844 | 2197693 | 257206 | 2196393 | La Amargosilla                      | 949.24638918  | 6.17 | 5.86 | 6.59 |
| Tierra y Libertad F.         | 9.767  | 50  | 356325 | 2205048 | 365851 | 2206526 | 361113 | 2205592 | Tierra y Libertad [Fraccionamiento] | 3057.64538731 | 6.17 | 5.93 | 6.59 |
| El Puerto(1) F.              | 9.650  | 108 | 253122 | 2213675 | 262428 | 2215610 | 257737 | 2214708 | El Puerto                           | 676.29458631  | 6.16 | 5.86 | 6.58 |
| Queréndaro(2) F.             | 9.621  | 70  | 300223 | 2189646 | 309460 | 2191403 | 304879 | 2190560 | Ninguno                             | 349.18369134  | 6.16 | 5.89 | 6.58 |
| Morelia Central Camionera F. | 9.573  | 60  | 265319 | 2177561 | 273110 | 2182740 | 269105 | 2180379 | CRUCO Chapingo (UACH)               | 2074.32211754 | 6.15 | 5.90 | 6.58 |
| El Paraíso F.                | 9.562  | 189 | 322914 | 2216254 | 332182 | 2216850 | 327607 | 2215734 | El Paraíso                          | 141.49600040  | 6.15 | 5.80 | 6.58 |
| La Higuera(2) F.             | 9.397  | 95  | 220394 | 2194570 | 229043 | 2197535 | 224746 | 2196014 | La Higuera                          | 6708.85548314 | 6.14 | 5.85 | 6.58 |
| Chucándiro(1) F.             | 9.380  | 136 | 253764 | 2196859 | 262001 | 2200933 | 257891 | 2198764 | Las Cruces                          | 375.14109659  | 6.14 | 5.82 | 6.58 |
| El Tejocote de Puruagua F.   | 9.372  | 101 | 354084 | 2211878 | 363037 | 2212945 | 358699 | 2211212 | El Tejocote de Puruagua             | 3740.02821696 | 6.14 | 5.85 | 6.58 |
| Chucandiro(4) F.             | 9.217  | 170 | 251035 | 2198832 | 259509 | 2202257 | 255310 | 2200446 | Los Baños                           | 1.96657965    | 6.13 | 5.79 | 6.57 |
| Huamango F.                  | 9.169  | 90  | 399814 | 2210353 | 408818 | 2209780 | 404326 | 2210293 | Huamango                            | 1714.76801624 | 6.13 | 5.85 | 6.57 |
| La Palma(3) F.               | 9.057  | 180 | 235554 | 2190684 | 226720 | 2190031 | 231178 | 2189919 | La Palma                            | 7873.40057798 | 6.12 | 5.78 | 6.57 |
| Los Alcantares F.            | 8.982  | 73  | 245780 | 2208207 | 238047 | 2203834 | 241941 | 2206029 | Los Alcantares                      | 2073.25740373 | 6.12 | 5.85 | 6.57 |
| El Puerto(7) F.              | 8.938  | 78  | 331367 | 2224682 | 339792 | 2226319 | 335394 | 2225873 | El Puerto                           | 869.69826753  | 6.12 | 5.85 | 6.57 |
| El Rancho(3) F.              | 8.910  | 65  | 305213 | 2211094 | 313767 | 2213225 | 309568 | 2211870 | El Rancho                           | 8909.52556672 | 6.11 | 5.86 | 6.57 |
| El Astillero F.              | 8.840  | 120 | 321172 | 2230457 | 329476 | 2229286 | 325487 | 2230692 | El Astillero                        | 938.20554013  | 6.11 | 5.80 | 6.56 |
| Las Mesas(1) F.              | 8.729  | 79  | 245708 | 2215433 | 253004 | 2219420 | 249090 | 2217812 | Las Mesas                           | 4518.04652757 | 6.10 | 5.83 | 6.56 |
| Guanguillo(1) F.             | 8.682  | 92  | 272479 | 2209937 | 264225 | 2211219 | 268396 | 2210880 | Guanguillo                          | 2811.64516591 | 6.10 | 5.82 | 6.56 |
| La Arpita F.                 | 8.588  | 110 | 291400 | 2218184 | 299767 | 2183402 | 295590 | 2182630 | La Arpita                           | 2688.97590101 | 6.09 | 5.80 | 6.56 |

|                            |       |     |        |         |        |         |        |         |                                              |               |      |      |      |
|----------------------------|-------|-----|--------|---------|--------|---------|--------|---------|----------------------------------------------|---------------|------|------|------|
| El Nogal(2) F.             | 8.544 | 73  | 367725 | 2209989 | 376021 | 2210101 | 371857 | 2210217 | El Nogal                                     | 462.69106334  | 6.09 | 5.83 | 6.56 |
| El Rincón(2) F.            | 8.431 | 170 | 249904 | 2164791 | 254099 | 2171642 | 251072 | 2168800 | El Rincón                                    | 5133.17744290 | 6.08 | 5.75 | 6.56 |
| Ponciano F.                | 8.341 | 121 | 304210 | 2207256 | 312078 | 2208215 | 308041 | 2207568 | Don Ponciano [Ganadería]                     | 3282.17620991 | 6.08 | 5.77 | 6.55 |
| Naranjilla(1) F.           | 8.284 | 150 | 330702 | 2233723 | 338677 | 2231890 | 334738 | 2233054 | La Loma de la Naranjilla                     | 1626.90579962 | 6.07 | 5.75 | 6.55 |
| San Pedro de la Loma(2) F. | 8.238 | 94  | 401536 | 2198065 | 393504 | 2199140 | 397496 | 2198667 | San Pedro de la Loma                         | 2023.51985378 | 6.07 | 5.79 | 6.55 |
| La Presa(3) F.             | 8.111 | 90  | 314072 | 2212279 | 306258 | 2212721 | 310201 | 2212237 | La Presa                                     | 9945.78665110 | 6.06 | 5.78 | 6.55 |
| El Cuervo F.               | 7.998 | 70  | 286375 | 2182280 | 293493 | 2185180 | 290187 | 2183203 | El Cuervo                                    | 349.32549109  | 6.05 | 5.80 | 6.54 |
| San Miguel Tlaxcaltepec F. | 7.930 | 118 | 382899 | 2225601 | 390434 | 2227384 | 386699 | 2226203 | Barrio Ojo de Agua (San Miguel Tlaxcaltepec) | 1034.03579488 | 6.05 | 5.75 | 6.54 |
| La Pastora(1) F.           | 7.913 | 93  | 329578 | 2227855 | 337064 | 2229799 | 333285 | 2229125 | La Pastora                                   | 1170.81137959 | 6.05 | 5.77 | 6.54 |
| Pozo de las Palomas(2) F.  | 7.912 | 85  | 385112 | 2206204 | 392700 | 2204203 | 388897 | 2205118 | Pozo de las Palomas                          | 1964.19001736 | 6.05 | 5.78 | 6.54 |
| Las Peñitas(3) F.          | 7.907 | 70  | 279257 | 2221122 | 286609 | 2221597 | 283092 | 2221842 | Las Peñitas                                  | 927.42169867  | 6.05 | 5.79 | 6.54 |
| La Cumbre F.               | 7.838 | 65  | 322558 | 2191116 | 330053 | 2191559 | 326379 | 2191374 | Los Dragones                                 | 1121.09684431 | 6.04 | 5.79 | 6.54 |
| La Herradura F.            | 7.834 | 60  | 289687 | 2188495 | 297244 | 2190013 | 293420 | 2189625 | Las Peñitas                                  | 41.97931336   | 6.04 | 5.80 | 6.54 |
| El Arenal(2) F.            | 7.830 | 110 | 272279 | 2218458 | 265348 | 2216107 | 268784 | 2217549 | El Arenal                                    | 8459.63158308 | 6.04 | 5.75 | 6.54 |
| Zepeda F.                  | 7.798 | 92  | 282605 | 2226264 | 289971 | 2227942 | 286214 | 2227315 | Zepeda                                       | 734.09605214  | 6.04 | 5.76 | 6.54 |
| Los Duraznos F.            | 7.759 | 91  | 348513 | 2212717 | 355392 | 2211231 | 351794 | 2211458 | Los Duraznos                                 | 5562.64736792 | 6.03 | 5.76 | 6.54 |
| Morelos F.                 | 7.634 | 50  | 264498 | 2174441 | 271794 | 2176329 | 268039 | 2175746 | Don Chema Mondragón                          | 245.60801118  | 6.03 | 5.80 | 6.53 |
| Las Peñitas(2) F.          | 7.606 | 95  | 279196 | 2221225 | 286425 | 2222549 | 282826 | 2222110 | El Puertecito de Tránsito                    | 2455.94721399 | 6.02 | 5.75 | 6.53 |
| Chirrienera F.             | 7.406 | 75  | 306870 | 2199252 | 313929 | 2200787 | 310442 | 2199831 | Chirrienera                                  | 957.69886896  | 6.01 | 5.75 | 6.53 |
| El Tapanco F.              | 7.396 | 131 | 293746 | 2228819 | 300313 | 2231229 | 297323 | 2229373 | El Tapanco                                   | 3836.15424094 | 6.01 | 5.70 | 6.53 |
| Santana(2) F.              | 7.266 | 72  | 328006 | 2233188 | 334697 | 2235688 | 331183 | 2234843 | Santana                                      | 142.90473584  | 6.00 | 5.75 | 6.52 |
| La Balastrera F.           | 7.220 | 113 | 376288 | 2208084 | 369331 | 2207858 | 372789 | 2207890 | La Balastrera                                | 929.27833995  | 5.99 | 5.71 | 6.52 |
| La Joya Grande(3) F.       | 7.220 | 77  | 284448 | 2227941 | 291234 | 2228824 | 287721 | 2228966 | La Joya Grande                               | 4165.03746580 | 5.99 | 5.74 | 6.52 |
| La Jara F.                 | 7.207 | 79  | 286867 | 2226614 | 293954 | 2227804 | 290446 | 2227035 | La Jara                                      | 260.41446154  | 5.99 | 5.74 | 6.52 |
| Santana(1) F.              | 7.205 | 122 | 327397 | 2231827 | 334366 | 2232642 | 330863 | 2232571 | Santana                                      | 7855.74574902 | 5.99 | 5.70 | 6.52 |
| La Palma(1) F.             | 7.168 | 150 | 221126 | 2192995 | 228001 | 2192055 | 224635 | 2192784 | La Palma                                     | 937.40566198  | 5.99 | 5.68 | 6.52 |
| Joyas del Pilar F.         | 7.148 | 150 | 342273 | 2199336 | 335199 | 2199261 | 338741 | 2199637 | Joyas del Pilar                              | 765.58018428  | 5.99 | 5.68 | 6.52 |
| Las Lajas(2) F.            | 7.109 | 88  | 383162 | 2221824 | 389838 | 2221011 | 386412 | 2220465 | Las Lajas                                    | 450.71489473  | 5.98 | 5.72 | 6.52 |
| Torreillas F.              | 7.094 | 138 | 268030 | 2169359 | 274109 | 2172884 | 271086 | 2171090 | Torreillas                                   | 4279.84581554 | 5.98 | 5.68 | 6.52 |
| La Yerbabuena F.           | 7.056 | 105 | 261925 | 2202314 | 268272 | 2199414 | 265079 | 2200803 | La Palma Mocha                               | 72.07127543   | 5.98 | 5.70 | 6.52 |
| El Chupadero F.            | 7.001 | 161 | 241171 | 2208007 | 235322 | 2204561 | 238486 | 2205937 | El Chupadero                                 | 1040.44608362 | 5.98 | 5.66 | 6.52 |
| San Francisco Shaxni F.    | 6.963 | 169 | 401562 | 2217003 | 394921 | 2218890 | 398186 | 2217767 | Rincón de San Francisco Shaxni               | 3809.42658086 | 5.97 | 5.65 | 6.52 |
| Presa Santa Teresa F.      | 6.913 | 85  | 371251 | 2197784 | 377581 | 2199708 | 374247 | 2199234 | Arroyo del Muerto (Presa Santa Teresa)       | 144.64876346  | 5.97 | 5.71 | 6.51 |
| Tacupo(1) F.               | 6.829 | 60  | 232131 | 2191694 | 238522 | 2193773 | 235287 | 2192875 | Tacupo                                       | 3068.68450148 | 5.96 | 5.73 | 6.51 |
| Los Chamacueros F.         | 6.813 | 103 | 385100 | 2196323 | 391672 | 2194749 | 388423 | 2195669 | Los Chamacueros                              | 2006.31990183 | 5.96 | 5.68 | 6.51 |
| Canoas(1) F.               | 6.776 | 83  | 377991 | 2195811 | 384595 | 2195714 | 381267 | 2196309 | Canoas                                       | 963.98717314  | 5.96 | 5.70 | 6.51 |
| El Arca de Noé(1) F.       | 6.750 | 80  | 262815 | 2214120 | 268848 | 2213383 | 265934 | 2214406 | El Arca de Noé                               | 4600.35140305 | 5.95 | 5.70 | 6.51 |
| El Fresno F.               | 6.714 | 108 | 257898 | 2192400 | 252802 | 2188479 | 255713 | 2189953 | El Fresno                                    | 2323.36577393 | 5.95 | 5.67 | 6.51 |
| San Carlos F.              | 6.701 | 49  | 388056 | 2222820 | 394333 | 2221135 | 391031 | 2221478 | San Carlos                                   | 531.69643359  | 5.95 | 5.74 | 6.51 |
| San Pedro F.               | 6.659 | 85  | 271485 | 2199708 | 277456 | 2202490 | 274376 | 2201337 | San Pedro                                    | 3867.30285755 | 5.95 | 5.69 | 6.51 |

|                        |       |     |        |         |        |         |        |         |                                    |                |      |      |      |
|------------------------|-------|-----|--------|---------|--------|---------|--------|---------|------------------------------------|----------------|------|------|------|
| Las Peñitas(1) F.      | 6.507 | 123 | 277490 | 2221738 | 283554 | 2222679 | 280540 | 2221847 | Las Peñitas                        | 3050.94671837  | 5.93 | 5.65 | 6.50 |
| Los Aguacates(1) F.    | 6.488 | 50  | 231146 | 2200785 | 236198 | 2204573 | 233776 | 2202590 | Los Aguacates                      | 4839.71192451  | 5.93 | 5.72 | 6.50 |
| Pueblo Nuevo F.        | 6.473 | 45  | 380649 | 2206893 | 374268 | 2206444 | 377442 | 2206742 | Pueblo Nuevo                       | 1176.67814266  | 5.93 | 5.73 | 6.50 |
| Potrero la Raya(1) F.  | 6.432 | 60  | 258710 | 2219392 | 264173 | 2222244 | 261228 | 2221208 | Potrero la Raya                    | 1848.77165079  | 5.93 | 5.70 | 6.50 |
| La Purísima(3) F.      | 6.413 | 95  | 387751 | 2216712 | 393761 | 2215925 | 390852 | 2216289 | La Purísima                        | 6275.32368268  | 5.93 | 5.66 | 6.50 |
| La Presita F.          | 6.330 | 143 | 355416 | 2208575 | 361585 | 2208285 | 358502 | 2207906 | La Presita                         | 415.25083956   | 5.92 | 5.62 | 6.50 |
| Peña Blanca(2) F.      | 6.319 | 134 | 356587 | 2207642 | 350564 | 2206811 | 353520 | 2207620 | Peña Blanca                        | 1161.59119368  | 5.92 | 5.62 | 6.50 |
| Espanita F.            | 6.309 | 77  | 286223 | 2224007 | 292397 | 2224162 | 289309 | 2224168 | Espanita                           | 767.55853783   | 5.92 | 5.67 | 6.50 |
| El Chinapo F.          | 6.291 | 220 | 330159 | 2186627 | 324397 | 2186286 | 327119 | 2187359 | La Purísima F.                     | 1433.99109533  | 5.91 | 5.58 | 6.50 |
| La Palma(2) F.         | 6.160 | 140 | 219530 | 2194250 | 224956 | 2191813 | 221932 | 2192390 | La Palma                           | 10933.19156082 | 5.90 | 5.61 | 6.49 |
| Mexiquillo(7) F.       | 6.138 | 150 | 246743 | 2211477 | 251712 | 2214629 | 249267 | 2212935 | Mexiquillo                         | 5738.71379382  | 5.90 | 5.60 | 6.49 |
| Santa Inés(1) F.       | 6.102 | 66  | 254330 | 2197187 | 259997 | 2198792 | 257248 | 2197605 | Santa Inés                         | 1395.43014777  | 5.90 | 5.67 | 6.49 |
| Los Coyotes F.         | 6.084 | 82  | 329618 | 2194526 | 323657 | 2193917 | 326657 | 2194140 | Presa el Gachupín                  | 2621.40233598  | 5.90 | 5.65 | 6.49 |
| Rosa de Castilla(1) F. | 6.078 | 90  | 259608 | 2197712 | 264498 | 2201067 | 262088 | 2199396 | Rosa de Castilla                   | 1157.47183181  | 5.89 | 5.64 | 6.49 |
| El Arca de Noé(2) F.   | 6.012 | 106 | 258321 | 2214304 | 264185 | 2214996 | 261240 | 2214695 | El Arca de Noé                     | 5384.17658371  | 5.89 | 5.62 | 6.49 |
| Monte de los Olivos F. | 5.922 | 130 | 263811 | 2219768 | 269331 | 2221885 | 266585 | 2220798 | Monte de los Olivos (Las Flores)   | 3687.40314191  | 5.88 | 5.59 | 6.48 |
| El Tablón F.           | 5.906 | 66  | 237916 | 2217746 | 243149 | 2220343 | 240486 | 2219137 | El Tablón                          | 5114.68098526  | 5.88 | 5.65 | 6.48 |
| La Bodega(1) F.        | 5.893 | 118 | 254902 | 2225723 | 259773 | 2227690 | 257780 | 2225672 | La Bodega                          | 8251.71283756  | 5.88 | 5.60 | 6.48 |
| La Colmena(1) F.       | 5.886 | 70  | 263174 | 2196045 | 268286 | 2198754 | 265787 | 2197385 | La Colmena                         | 2824.45061146  | 5.88 | 5.64 | 6.48 |
| Cruz Blanca(2) F.      | 5.870 | 136 | 401495 | 2201915 | 396021 | 2203435 | 398668 | 2202529 | La Magdalena Cruz Blanca           | 4317.65876702  | 5.87 | 5.58 | 6.48 |
| El Puertecito(2) F.    | 5.865 | 65  | 285066 | 2221107 | 290316 | 2222938 | 287535 | 2222130 | El Puertecito de Tránsito          | 2236.32414942  | 5.87 | 5.65 | 6.48 |
| Mexiquillo(5) F.       | 5.782 | 45  | 249468 | 2215027 | 254512 | 2217646 | 251964 | 2216361 | Mexiquillo                         | 10132.28372671 | 5.87 | 5.67 | 6.48 |
| Buena Vista F.         | 5.757 | 70  | 230603 | 2196394 | 235732 | 2198499 | 233306 | 2197112 | Buena Vista                        | 86.77653926    | 5.86 | 5.63 | 6.48 |
| El Cerrito(2) F.       | 5.746 | 58  | 277142 | 2210851 | 282653 | 2209901 | 279897 | 2210208 | El Cerrito                         | 2367.69109075  | 5.86 | 5.65 | 6.48 |
| Llano Grande(2) F.     | 5.717 | 60  | 334529 | 2191158 | 328995 | 2190054 | 331691 | 2190885 | Llano Grande                       | 2850.19347468  | 5.86 | 5.64 | 6.48 |
| Las Coronillas F.      | 5.630 | 80  | 267778 | 2197403 | 273290 | 2198198 | 270524 | 2197759 | Las Coronillas                     | 2869.16812354  | 5.85 | 5.61 | 6.47 |
| Potrero Grande F.      | 5.590 | 88  | 303201 | 2223867 | 308470 | 2224187 | 305886 | 2224168 | Potrero Grande                     | 538.02663670   | 5.85 | 5.60 | 6.47 |
| Las Joyas F.           | 5.577 | 100 | 356536 | 2189246 | 361492 | 2190978 | 359237 | 2189738 | Las Joyas                          | 1228.44369557  | 5.85 | 5.59 | 6.47 |
| Buenos Aires(1) F.     | 5.543 | 89  | 244852 | 2191083 | 249720 | 2193505 | 247325 | 2192201 | Buenos Aires                       | 13120.35546607 | 5.84 | 5.59 | 6.47 |
| El Salto F.            | 5.481 | 170 | 348421 | 2210385 | 353827 | 2210875 | 351107 | 2210840 | El Salto                           | 5311.81932286  | 5.84 | 5.53 | 6.47 |
| Pto(1) F.              | 5.480 | 73  | 261100 | 2196008 | 265068 | 2199518 | 263330 | 2197518 | Pto                                | 7310.95579585  | 5.84 | 5.60 | 6.47 |
| Cuto del Porvenir F.   | 5.456 | 80  | 276976 | 2199802 | 282123 | 2201180 | 279607 | 2200261 | Cuto del Porvenir                  | 6431.99881399  | 5.83 | 5.59 | 6.47 |
| La Higuera(1) F.       | 5.412 | 84  | 224257 | 2195496 | 229215 | 2197036 | 226781 | 2196093 | La Higuera                         | 5072.32520162  | 5.83 | 5.59 | 6.46 |
| Balcón del Diablo F.   | 5.397 | 94  | 359569 | 2204394 | 364407 | 2202294 | 362085 | 2203601 | Balcón del Diablo                  | 808.70709568   | 5.83 | 5.57 | 6.46 |
| Concharrás F.          | 5.376 | 100 | 346785 | 2188060 | 351763 | 2190020 | 349336 | 2188907 | Concharrás                         | 3084.36556330  | 5.82 | 5.57 | 6.46 |
| Col Lázaro Cárdenas F. | 5.354 | 82  | 214189 | 2206268 | 210026 | 2203034 | 212160 | 2204606 | San José (Colonia Lázaro Cárdenas) | 669.72718075   | 5.82 | 5.58 | 6.46 |
| La Curva(1) F.         | 5.325 | 60  | 242384 | 2214636 | 246747 | 2217574 | 244418 | 2216318 | La Curva                           | 3058.13114997  | 5.82 | 5.61 | 6.46 |
| La Palma(4) F.         | 5.314 | 54  | 219759 | 2192820 | 224861 | 2194087 | 222332 | 2193439 | La Palma                           | 12878.41384602 | 5.82 | 5.62 | 6.46 |
| La Hacienda F.         | 5.292 | 104 | 237338 | 2200402 | 242306 | 2201604 | 239746 | 2201031 | La Hacienda                        | 2185.49455317  | 5.82 | 5.56 | 6.46 |
| El Chino F.            | 5.249 | 70  | 323675 | 2190505 | 328711 | 2190451 | 326187 | 2190769 | Agua Fria (Pizcuaro)               | 1209.57846514  | 5.81 | 5.59 | 6.46 |

|                         |       |     |        |         |        |         |        |         |                           |                |      |      |      |
|-------------------------|-------|-----|--------|---------|--------|---------|--------|---------|---------------------------|----------------|------|------|------|
| Choromuco F.            | 5.235 | 133 | 319514 | 2198699 | 315180 | 2200990 | 317442 | 2200038 | Choromuco                 | 2540.85964950  | 5.81 | 5.53 | 6.46 |
| Las Flores(1) F.        | 5.182 | 135 | 269326 | 2215601 | 274314 | 2216014 | 271794 | 2215907 | Las Flores                | 4342.02459755  | 5.80 | 5.52 | 6.46 |
| Chucandiro(3) F.        | 5.179 | 68  | 249825 | 2198041 | 254532 | 2199861 | 252221 | 2198791 | Los Baños                 | 1697.05858926  | 5.80 | 5.58 | 6.46 |
| Mexiquillo(4) F.        | 5.174 | 139 | 247950 | 2213783 | 252448 | 2216072 | 250011 | 2215285 | Mexiquillo                | 8850.64756384  | 5.80 | 5.52 | 6.46 |
| Francisco Villa(1) F.   | 5.174 | 65  | 293443 | 2230963 | 298415 | 2230533 | 295941 | 2230972 | Francisco Villa           | 10094.20390457 | 5.80 | 5.59 | 6.46 |
| Tejocote de Pastores F. | 5.152 | 60  | 282269 | 2224535 | 287100 | 2225913 | 284619 | 2225318 | Tejocote de Pastores      | 1208.42147352  | 5.80 | 5.59 | 6.45 |
| La Pastora(2) F.        | 5.151 | 83  | 331208 | 2228577 | 335717 | 2230558 | 333180 | 2230230 | La Pastora                | 3361.92946943  | 5.80 | 5.56 | 6.45 |
| La Tomasa F.            | 5.147 | 118 | 345961 | 2227531 | 350427 | 2225772 | 347978 | 2226164 | La Tomasa                 | 2115.17453164  | 5.80 | 5.53 | 6.45 |
| Las Mesas(5) F.         | 5.130 | 73  | 253828 | 2221628 | 258877 | 2221551 | 256367 | 2221825 | Las Mesas                 | 4408.91223880  | 5.80 | 5.57 | 6.45 |
| La Joya Grande(2) F.    | 5.066 | 147 | 293086 | 2227963 | 297685 | 2229246 | 295495 | 2228052 | La Joya Grande            | 6817.03539821  | 5.79 | 5.50 | 6.45 |
| Cruz Blanca(1) F.       | 5.047 | 70  | 387790 | 2204625 | 392585 | 2203163 | 390221 | 2204026 | La Magdalena Cruz Blanca  | 10899.73610278 | 5.79 | 5.57 | 6.45 |
| Emiliano Zapata F.      | 5.046 | 132 | 211925 | 2206056 | 216331 | 2208365 | 214253 | 2206958 | Emiliano Zapata [Colonia] | 3883.82993157  | 5.79 | 5.51 | 6.45 |
| Buenos Aires(2) F.      | 5.038 | 68  | 251550 | 2193356 | 255777 | 2195937 | 253663 | 2194643 | Buenos Aires              | 1251.08262147  | 5.79 | 5.57 | 6.45 |
| Las Granjas(1) F.       | 5.036 | 130 | 216403 | 2205525 | 219156 | 2209697 | 217581 | 2207736 | Las Granjas               | 4280.94547313  | 5.79 | 5.51 | 6.45 |
| Las Cuatro Milpas(3) F. | 4.968 | 103 | 215729 | 2211846 | 220441 | 2213226 | 218028 | 2212777 | Las Cuatro Milpas         | 6721.20719669  | 5.78 | 5.53 | 6.45 |
| Rancho la Esperanza F.  | 4.957 | 50  | 399938 | 2204077 | 404587 | 2204724 | 402121 | 2204947 | Rancho la Esperanza       | 8093.57555262  | 5.78 | 5.59 | 6.45 |
| La Mora F.              | 4.952 | 60  | 316005 | 2203589 | 320855 | 2203881 | 318476 | 2203681 | La Mora                   | 3681.94442436  | 5.78 | 5.57 | 6.45 |
| El Rincón(3) F.         | 4.951 | 83  | 266670 | 2214672 | 271202 | 2213456 | 268884 | 2213791 | El Rincón                 | 8616.51758230  | 5.78 | 5.54 | 6.45 |
| El Potrero F.           | 4.943 | 82  | 351792 | 2223900 | 356120 | 2225395 | 353777 | 2224956 | El Potrero                | 1782.137770517 | 5.78 | 5.54 | 6.45 |
| San Miguel Chupadero F. | 4.941 | 100 | 348341 | 2209595 | 353046 | 2210280 | 350716 | 2209727 | San Miguel Chupadero      | 2605.48139813  | 5.78 | 5.52 | 6.45 |
| Santa Mónica F.         | 4.931 | 102 | 264184 | 2170191 | 259941 | 2168025 | 262039 | 2169121 | Santa Mónica              | 124.802222938  | 5.77 | 5.52 | 6.45 |
| Carucho Chico(1) F.     | 4.927 | 92  | 245687 | 2201017 | 250408 | 2202038 | 248108 | 2201241 | Carucho Chico             | 4379.66739509  | 5.77 | 5.53 | 6.45 |
| El Reseco(1) F.         | 4.914 | 90  | 263673 | 2212894 | 268299 | 2213624 | 265941 | 2213623 | El Reseco                 | 3049.63057124  | 5.77 | 5.53 | 6.44 |
| San Ángel(1) F.         | 4.893 | 90  | 236781 | 2198377 | 240664 | 2200992 | 238962 | 2199414 | San Ángel                 | 3941.52920444  | 5.77 | 5.53 | 6.44 |
| Mexiquillo(3) F.        | 4.860 | 137 | 250426 | 2213391 | 255022 | 2214834 | 252739 | 2214075 | Mexiquillo                | 2149.78037685  | 5.77 | 5.49 | 6.44 |
| Santa Teresa(3) F.      | 4.840 | 142 | 220013 | 2210053 | 224197 | 2212456 | 222136 | 2211189 | Santa Teresa              | 5922.16630469  | 5.76 | 5.48 | 6.44 |
| Las Cuatro Milpas(1) F. | 4.796 | 91  | 216242 | 2211507 | 220593 | 2213499 | 218453 | 2212419 | Las Cuatro Milpas         | 8693.63244964  | 5.76 | 5.52 | 6.44 |
| El Ranchito(1) F.       | 4.680 | 114 | 308531 | 2214624 | 312989 | 2215296 | 310835 | 2214480 | El Ranchito               | 1933.24220493  | 5.74 | 5.49 | 6.44 |
| La Pila F.              | 4.675 | 55  | 287792 | 2226504 | 292390 | 2226492 | 290099 | 2226437 | La Pila                   | 351.35773167   | 5.74 | 5.55 | 6.43 |
| La Colina F.            | 4.670 | 0   | 264763 | 2178958 | 268744 | 2181345 | 266739 | 2180202 | Ejido la Quemada          | 1762.18663913  | 5.74 | 6.43 | 6.43 |
| Huiramba F.             | 4.665 | 50  | 246180 | 2161641 | 248838 | 2165426 | 247400 | 2163590 | El Rincón                 | 369.33843132   | 5.74 | 5.56 | 6.43 |
| El Ranchito(2) F.       | 4.665 | 88  | 306216 | 2213007 | 310767 | 2213602 | 308451 | 2213597 | El Ranchito               | 7985.83964548  | 5.74 | 5.51 | 6.43 |
| San Antonio(2) F.       | 4.645 | 140 | 297767 | 2214797 | 302199 | 2213590 | 299969 | 2214192 | San Antonio               | 6756.43486232  | 5.74 | 5.46 | 6.43 |
| Santa Teresa(2) F.      | 4.640 | 100 | 231365 | 2212794 | 227632 | 2210583 | 229127 | 2212203 | Santa Teresa              | 10762.75576038 | 5.74 | 5.49 | 6.43 |
| Rosa de Castilla(2) F.  | 4.627 | 95  | 259783 | 2199046 | 263275 | 2201860 | 261719 | 2200210 | Rosa de Castilla          | 990.05719956   | 5.74 | 5.50 | 6.43 |
| Los Zavala(2) F.        | 4.612 | 88  | 278955 | 2223586 | 283208 | 2225121 | 281089 | 2224425 | Los Zavala                | 3891.65989969  | 5.74 | 5.50 | 6.43 |
| Francisco Villa(2) F.   | 4.605 | 89  | 289923 | 2230792 | 294438 | 2231573 | 292184 | 2231214 | Francisco Villa           | 6426.52428708  | 5.74 | 5.50 | 6.43 |
| Peña Cargada F.         | 4.587 | 60  | 286690 | 2177895 | 290922 | 2179468 | 288884 | 2178429 | Peña Blanca               | 658.93429723   | 5.73 | 5.53 | 6.43 |
| Las Cútuas(1) F.        | 4.536 | 58  | 265258 | 2222004 | 269549 | 2223364 | 267372 | 2222745 | Las Cútuas                | 1142.26573983  | 5.73 | 5.53 | 6.43 |
| Guanguillo(2) F.        | 4.530 | 80  | 270359 | 2210359 | 274698 | 2210029 | 272490 | 2209726 | Guanguillo                | 1742.51020704  | 5.73 | 5.50 | 6.43 |

|                            |       |     |        |         |        |         |        |         |                              |                |      |      |      |
|----------------------------|-------|-----|--------|---------|--------|---------|--------|---------|------------------------------|----------------|------|------|------|
| Potrero la Raya(2) F.      | 4.487 | 92  | 257228 | 2217180 | 261481 | 2218024 | 259375 | 2217530 | Potrero la Raya              | 9223.21235884  | 5.72 | 5.48 | 6.43 |
| El Paderón F.              | 4.486 | 72  | 349904 | 2216619 | 354115 | 2216903 | 352025 | 2216351 | El Paderón                   | 530.63877564   | 5.72 | 5.50 | 6.43 |
| Pío(2) F.                  | 4.480 | 80  | 259252 | 2196347 | 263395 | 2197899 | 261340 | 2197112 | Pío                          | 2768.99589967  | 5.72 | 5.49 | 6.43 |
| El Puertecito(2) F.        | 4.465 | 111 | 350702 | 2214384 | 355070 | 2214178 | 352901 | 2214564 | El Puertecito (Puruagua)     | 1973.34319143  | 5.72 | 5.46 | 6.43 |
| Laguna Seca F.             | 4.462 | 160 | 320063 | 2193112 | 324460 | 2192941 | 322273 | 2193247 | Laguna Seca                  | 1323.87698632  | 5.72 | 5.43 | 6.43 |
| La Laja F.                 | 4.457 | 68  | 358612 | 2192958 | 362872 | 2193807 | 360682 | 2193784 | La Laja                      | 540.63396958   | 5.72 | 5.51 | 6.43 |
| La Presa(4) F.             | 4.456 | 101 | 310500 | 2210294 | 314596 | 2211786 | 312656 | 2210752 | La Presa                     | 9035.87145536  | 5.72 | 5.47 | 6.43 |
| Mexiquillo(1) F.           | 4.408 | 152 | 252443 | 2215050 | 256126 | 2217279 | 254235 | 2216221 | Mexiquillo                   | 5654.65575203  | 5.71 | 5.43 | 6.42 |
| San Ángel(3) F.            | 4.405 | 91  | 240553 | 2199994 | 244424 | 2201821 | 242388 | 2201071 | San Ángel                    | 4949.59855694  | 5.71 | 5.48 | 6.42 |
| Las Mesas(3) F.            | 4.403 | 81  | 248417 | 2218281 | 252241 | 2220361 | 250252 | 2219476 | Las Mesas                    | 2252.98405223  | 5.71 | 5.49 | 6.42 |
| Tierras Blancas(2) F.      | 4.394 | 73  | 309388 | 2202427 | 313657 | 2202539 | 311545 | 2202095 | Tierras Blancas              | 539.04723293   | 5.71 | 5.49 | 6.42 |
| Los Pirules F.             | 4.375 | 61  | 383082 | 2203666 | 379181 | 2205195 | 381290 | 2204851 | Los Pirules                  | 2859.02605800  | 5.71 | 5.51 | 6.42 |
| El Arca de Noé(3) F.       | 4.367 | 80  | 262545 | 2216583 | 266349 | 2218240 | 264497 | 2217357 | El Arca de Noé               | 11731.32373659 | 5.71 | 5.48 | 6.42 |
| La Joya de Puruagua F.     | 4.341 | 170 | 350900 | 2214368 | 354678 | 2215930 | 352938 | 2214819 | La Joya de Puruagua          | 2467.41923208  | 5.70 | 5.41 | 6.42 |
| San Isidro(2) F.           | 4.336 | 60  | 291104 | 2215817 | 295409 | 2215393 | 293258 | 2215619 | San Isidro                   | 2636.17145274  | 5.70 | 5.50 | 6.42 |
| Tres Reyes(2) F.           | 4.327 | 78  | 232080 | 2203603 | 235763 | 2205697 | 234043 | 2204397 | Tres Reyes (Las Tetillas)    | 7820.13368361  | 5.70 | 5.48 | 6.42 |
| Peñon del Divisadero F.    | 4.319 | 68  | 270239 | 2231455 | 274430 | 2232336 | 272340 | 2231845 | Peñon del Divisadero         | 812.98626741   | 5.70 | 5.49 | 6.42 |
| Pueblo Viejo F.            | 4.318 | 100 | 204446 | 2199268 | 208714 | 2199268 | 206580 | 2199004 | Pueblo Viejo                 | 3707.22956701  | 5.70 | 5.46 | 6.42 |
| Las Mesas(4) F.            | 4.314 | 90  | 249759 | 2216301 | 253291 | 2218595 | 251399 | 2217638 | Las Mesas                    | 7354.62695583  | 5.70 | 5.47 | 6.42 |
| Santa Inés(2) F.           | 4.306 | 88  | 253920 | 2196797 | 257764 | 2198426 | 255926 | 2197464 | Santa Inés                   | 2469.52869275  | 5.70 | 5.47 | 6.42 |
| El Caracol F.              | 4.278 | 232 | 276777 | 2165608 | 280195 | 2168094 | 278342 | 2167064 | El Caracol                   | 2718.62602113  | 5.69 | 5.38 | 6.42 |
| La Curva(2) F.             | 4.271 | 93  | 242823 | 2213886 | 246661 | 2215197 | 244621 | 2214787 | La Curva                     | 753.35579064   | 5.69 | 5.46 | 6.42 |
| La Ilusión(2) F.           | 4.248 | 100 | 307750 | 2233569 | 311767 | 2232365 | 309783 | 2233034 | Ninguno [Pedro Torres Ayala] | 4689.65692473  | 5.69 | 5.45 | 6.42 |
| San Pedro de la Loma(1) F. | 4.228 | 49  | 402576 | 2198200 | 398890 | 2200058 | 400616 | 2198907 | San Pedro de la Loma         | 2673.90479564  | 5.69 | 5.51 | 6.41 |
| Tacupo(4) F.               | 4.226 | 65  | 243063 | 2195072 | 239236 | 2193562 | 241069 | 2194422 | Tacupo                       | 5024.50144837  | 5.69 | 5.48 | 6.41 |
| Nicasio Calderón F.        | 4.216 | 76  | 305131 | 2215626 | 309208 | 2216306 | 307193 | 2215751 | Nicasio Calderón             | 5144.34919563  | 5.68 | 5.47 | 6.41 |
| Siberia F.                 | 4.195 | 65  | 247529 | 2207148 | 251336 | 2208512 | 249448 | 2207900 | Siberia                      | 7268.34791907  | 5.68 | 5.48 | 6.41 |
| Las Granjas(2) F.          | 4.188 | 59  | 217392 | 2205233 | 221042 | 2207235 | 219242 | 2206203 | Las Granjas                  | 7649.37852098  | 5.68 | 5.49 | 6.41 |
| La Presa(2) F.             | 4.177 | 34  | 319585 | 2209691 | 323426 | 2211115 | 321539 | 2210254 | La Presa                     | 1039.77334087  | 5.68 | 5.53 | 6.41 |
| Queréndaro(3) F.           | 4.176 | 80  | 304771 | 2189815 | 308620 | 2190950 | 306741 | 2190379 | Ninguno                      | 6165.48942798  | 5.68 | 5.46 | 6.41 |
| Fracc. Santa Inés F.       | 4.166 | 210 | 272001 | 2184263 | 276111 | 2183853 | 274073 | 2184259 | Fraccionamiento Santa Inés   | 1048.45488344  | 5.68 | 5.37 | 6.41 |
| Los Villafuerte F.         | 4.137 | 83  | 281530 | 2200561 | 285283 | 2202063 | 283361 | 2201396 | Los Villafuerte              | 10206.82762082 | 5.67 | 5.45 | 6.41 |
| Tierras Blancas(1) F.      | 4.115 | 83  | 309532 | 2202729 | 313444 | 2203242 | 311535 | 2202615 | Tierras Blancas              | 1813.89598682  | 5.67 | 5.45 | 6.41 |
| El Agostadero F.           | 4.095 | 100 | 354326 | 2223482 | 357509 | 2225860 | 355792 | 2224897 | El Agostadero                | 2041.95513962  | 5.67 | 5.43 | 6.41 |
| Las Lajas(1) F.            | 4.077 | 123 | 389499 | 2217304 | 393415 | 2218416 | 391469 | 2217809 | Las Lajas                    | 11514.12804084 | 5.67 | 5.41 | 6.41 |
| San Alejo F.               | 4.042 | 88  | 323375 | 2190061 | 327163 | 2189462 | 325325 | 2190213 | Laguna Larga                 | 1465.70202622  | 5.66 | 5.43 | 6.41 |
| El Atravesaño F.           | 4.032 | 102 | 238036 | 2215567 | 241828 | 2216793 | 239859 | 2216378 | El Atravesaño                | 9510.40664224  | 5.66 | 5.42 | 6.40 |
| El Rincón(1) F.            | 4.016 | 140 | 250524 | 2169962 | 248774 | 2166418 | 249652 | 2168209 | El Rincón                    | 4896.68974150  | 5.66 | 5.39 | 6.40 |
| El Puerto(4) F.            | 4.009 | 88  | 253760 | 2213650 | 257632 | 2214228 | 255716 | 2213941 | El Puerto                    | 51.53344097    | 5.66 | 5.43 | 6.40 |
| Pamaseo(3) F.              | 4.005 | 63  | 258620 | 2224253 | 261429 | 2226552 | 260137 | 2225418 | Pamaseo                      | 7954.62307296  | 5.66 | 5.46 | 6.40 |

|                           |       |     |        |         |        |         |        |         |                              |                |      |      |      |
|---------------------------|-------|-----|--------|---------|--------|---------|--------|---------|------------------------------|----------------|------|------|------|
| Las Peñas(0032) F.        | 3.918 | 100 | 336507 | 2220210 | 340172 | 2220590 | 338425 | 2219908 | Las Peñas0032                | 55.65812774    | 5.64 | 5.41 | 6.40 |
| La Codorniz(2) F.         | 3.911 | 85  | 231331 | 2209871 | 234106 | 2212367 | 232460 | 2211354 | La Codorniz                  | 9033.86425678  | 5.64 | 5.42 | 6.40 |
| La Catarina F.            | 3.877 | 92  | 298658 | 2229822 | 302406 | 2229256 | 300483 | 2229250 | La Catarina                  | 5680.42306172  | 5.64 | 5.41 | 6.40 |
| San José del Rincón F.    | 3.859 | 65  | 310127 | 2196869 | 313673 | 2196750 | 311883 | 2196403 | San José del Rincón          | 2970.64664153  | 5.63 | 5.44 | 6.40 |
| Los Aguacates(2) F.       | 3.856 | 96  | 235588 | 2202501 | 239357 | 2202859 | 237508 | 2202507 | Los Aguacates                | 822.29625231   | 5.63 | 5.40 | 6.40 |
| San Antonio(1) F.         | 3.828 | 71  | 296201 | 2217639 | 299825 | 2217361 | 298076 | 2217965 | San Antonio                  | 4764.17935453  | 5.63 | 5.43 | 6.39 |
| Los Pastor F.             | 3.825 | 60  | 283496 | 2191750 | 286567 | 2193916 | 285139 | 2192700 | Los Pastor                   | 424.07927838   | 5.63 | 5.44 | 6.39 |
| La Bodega(2) F.           | 3.797 | 91  | 254810 | 2225452 | 258278 | 2225095 | 256466 | 2224619 | La Bodega                    | 8300.15846785  | 5.62 | 5.40 | 6.39 |
| Los Zavala(3) F.          | 3.780 | 70  | 278701 | 2222789 | 282345 | 2223507 | 280556 | 2222983 | Los Zavala                   | 191.91566361   | 5.62 | 5.42 | 6.39 |
| Huingo(2) F.              | 3.779 | 65  | 305785 | 2201341 | 309214 | 2202219 | 307409 | 2202163 | Huingo                       | 149.97095331   | 5.62 | 5.43 | 6.39 |
| La Chivería(1) F.         | 3.776 | 91  | 323277 | 2212401 | 326914 | 2213398 | 325090 | 2212911 | La Chivería                  | 4450.27269671  | 5.62 | 5.40 | 6.39 |
| Francisco Villa(3) F.     | 3.761 | 70  | 292818 | 2230388 | 296444 | 2230443 | 294649 | 2230017 | Francisco Villa              | 10181.91350006 | 5.62 | 5.42 | 6.39 |
| La Mesa del Venado F.     | 3.756 | 105 | 384982 | 2208529 | 388522 | 2207397 | 386778 | 2208048 | La Mesa del Venado           | 2577.80657123  | 5.62 | 5.38 | 6.39 |
| El Puerto(2) F.           | 3.721 | 95  | 253851 | 2214349 | 257058 | 2215810 | 255628 | 2214780 | El Puerto                    | 2427.25762834  | 5.61 | 5.39 | 6.39 |
| El Puerto(3) F.           | 3.720 | 75  | 253702 | 2213493 | 257301 | 2213435 | 255492 | 2213203 | El Puerto                    | 1754.02973293  | 5.61 | 5.41 | 6.39 |
| La Placita F.             | 3.710 | 70  | 366422 | 2210740 | 369537 | 2212488 | 368006 | 2211657 | La Placita                   | 1274.54383445  | 5.61 | 5.41 | 6.39 |
| La Redonda F.             | 3.708 | 99  | 335515 | 2235510 | 339177 | 2235399 | 337352 | 2235550 | La Redonda                   | 5673.12045354  | 5.61 | 5.38 | 6.39 |
| La Puerta del Agua(3) F.  | 3.706 | 85  | 300699 | 2222413 | 304294 | 2221856 | 302474 | 2221976 | La Puerta del Agua           | 4099.81355655  | 5.61 | 5.39 | 6.39 |
| Las Cútuas(2) F.          | 3.695 | 97  | 265257 | 2222139 | 268329 | 2223881 | 266989 | 2222760 | Las Cútuas                   | 359.15638605   | 5.61 | 5.38 | 6.39 |
| La Lagunita F.            | 3.686 | 155 | 352063 | 2212758 | 355635 | 2213061 | 353865 | 2212765 | La Lagunita                  | 2851.52352750  | 5.61 | 5.34 | 6.39 |
| La Bodega(3) F.           | 3.686 | 52  | 250517 | 2223598 | 253610 | 2225469 | 251919 | 2224791 | La Bodega                    | 4178.44846262  | 5.61 | 5.43 | 6.39 |
| La Puerta del Agua(1) F.  | 3.663 | 236 | 299953 | 2224180 | 303289 | 2224833 | 301702 | 2224010 | La Puerta del Agua           | 7877.62981904  | 5.60 | 5.30 | 6.39 |
| La Lagunita F.            | 3.641 | 44  | 256902 | 2182704 | 260069 | 2184292 | 258370 | 2183687 | La Lagunita                  | 9534.34815704  | 5.60 | 5.44 | 6.38 |
| El Arenal(1) F.           | 3.608 | 64  | 304632 | 2197638 | 307160 | 2200079 | 305832 | 2198898 | El Arenal                    | 2372.27930396  | 5.60 | 5.41 | 6.38 |
| San Ángel(4) F.           | 3.587 | 67  | 241056 | 2203506 | 243950 | 2205578 | 242423 | 2204650 | San Ángel                    | 4730.32129541  | 5.59 | 5.40 | 6.38 |
| El Puerto(6) F.           | 3.582 | 50  | 255206 | 2213673 | 258615 | 2213921 | 256907 | 2213953 | El Puerto                    | 794.74315231   | 5.59 | 5.42 | 6.38 |
| Pamaseo(2) F.             | 3.580 | 101 | 258133 | 2224616 | 260855 | 2226444 | 259548 | 2225513 | Pamaseo                      | 10080.00995466 | 5.59 | 5.36 | 6.38 |
| Canoas(2) F.              | 3.565 | 93  | 381329 | 2195517 | 384820 | 2195258 | 383051 | 2195469 | Canoas                       | 2797.19940535  | 5.59 | 5.37 | 6.38 |
| Naranjilla(2) F.          | 3.561 | 57  | 337840 | 2232495 | 341177 | 2233625 | 339445 | 2233253 | La Loma de la Naranjilla     | 4287.79839467  | 5.59 | 5.41 | 6.38 |
| La Purísima(4) F.         | 3.560 | 108 | 390736 | 2215771 | 394019 | 2214800 | 392268 | 2214912 | La Purísima                  | 15789.45157848 | 5.59 | 5.35 | 6.38 |
| Corral de las Ardillas F. | 3.559 | 57  | 353603 | 2197141 | 356941 | 2195964 | 355236 | 2196439 | Corral de las Ardillas       | 257.07020886   | 5.59 | 5.41 | 6.38 |
| La Purísima(1) F.         | 3.535 | 85  | 387680 | 2214309 | 390506 | 2212322 | 389043 | 2213206 | La Purísima                  | 8223.99217825  | 5.58 | 5.37 | 6.38 |
| La Ilusión(1) F.          | 3.532 | 61  | 308098 | 2234131 | 311597 | 2233745 | 309859 | 2234025 | Ninguno [Pedro Torres Ayala] | 837.21676820   | 5.58 | 5.40 | 6.38 |
| Llano Grande(3) F.        | 3.526 | 70  | 328972 | 2189533 | 332334 | 2189875 | 330667 | 2189324 | Llano Grande                 | 1885.99826916  | 5.58 | 5.39 | 6.38 |
| Tacupo(2) F.              | 3.496 | 70  | 238921 | 2191943 | 242098 | 2193260 | 240445 | 2192758 | Tacupo                       | 8693.83907139  | 5.58 | 5.38 | 6.38 |
| Caballerías(1) F.         | 3.493 | 65  | 243974 | 2213512 | 247022 | 2214243 | 245427 | 2214258 | Caballerías                  | 3046.78299541  | 5.58 | 5.39 | 6.38 |
| Caballerías(2) F.         | 3.484 | 75  | 246303 | 2215619 | 249607 | 2216362 | 247901 | 2216073 | Caballerías                  | 13185.29352952 | 5.58 | 5.37 | 6.37 |
| Los Mezquites(2) F.       | 3.455 | 56  | 316939 | 2207779 | 320054 | 2208902 | 318479 | 2208374 | Los Mezquites                | 1407.78589179  | 5.57 | 5.39 | 6.37 |
| Los Zavala(4) F.          | 3.451 | 56  | 280196 | 2222700 | 283514 | 2222999 | 281869 | 2222941 | Los Zavala                   | 746.08134425   | 5.57 | 5.39 | 6.37 |
| Las Peñas F.              | 3.444 | 65  | 285404 | 2197484 | 288364 | 2199097 | 286851 | 2198355 | Las Peñas                    | 182.92430048   | 5.57 | 5.38 | 6.37 |

|                             |       |     |        |         |        |         |        |         |                            |                |      |      |      |
|-----------------------------|-------|-----|--------|---------|--------|---------|--------|---------|----------------------------|----------------|------|------|------|
| La Curva(3) F.              | 3.432 | 45  | 239011 | 2215458 | 242348 | 2215665 | 240701 | 2215264 | La Curva                   | 6389.21907688  | 5.57 | 5.41 | 6.37 |
| El Campamento F.            | 3.413 | 59  | 362870 | 2199652 | 366192 | 2199985 | 364557 | 2199576 | El Campamento              | 1335.43499346  | 5.56 | 5.38 | 6.37 |
| El Cuitzillo F.             | 3.395 | 73  | 311248 | 2193164 | 314482 | 2193128 | 312880 | 2192905 | El Cuitzillo               | 1559.88385727  | 5.56 | 5.36 | 6.37 |
| Mexiquillo(2) F.            | 3.376 | 64  | 249931 | 2216246 | 253153 | 2217095 | 251541 | 2216648 | Mexiquillo                 | 11533.66998173 | 5.56 | 5.37 | 6.37 |
| Llano Grande(1) F.          | 3.369 | 50  | 329198 | 2189851 | 332446 | 2190606 | 330819 | 2190259 | Llano Grande               | 2961.88256915  | 5.56 | 5.39 | 6.37 |
| Las Granjas(3) F.           | 3.356 | 194 | 214026 | 2206440 | 217135 | 2205222 | 215580 | 2205808 | Las Granjas                | 801.60593673   | 5.55 | 5.27 | 6.37 |
| La Colmena(2) F.            | 3.348 | 90  | 266647 | 2199636 | 264228 | 2197546 | 265343 | 2198697 | La Colmena                 | 6515.16976560  | 5.55 | 5.34 | 6.37 |
| La Cuesta del Chivero F.    | 3.332 | 132 | 234396 | 2214872 | 237581 | 2215546 | 235988 | 2215184 | La Cuesta del Chivero      | 7202.47146541  | 5.55 | 5.30 | 6.37 |
| Los Guerreros F.            | 3.313 | 420 | 334126 | 2198790 | 330834 | 2198950 | 332483 | 2198804 | Los Guerreros              | 1440.59001233  | 5.55 | 5.20 | 6.36 |
| El Puerto(5) F.             | 3.313 | 74  | 251807 | 2214668 | 255034 | 2214929 | 253400 | 2214829 | El Puerto                  | 3672.70012149  | 5.55 | 5.35 | 6.36 |
| Santa Teresa(1) F.          | 3.305 | 76  | 224665 | 2209430 | 225931 | 2212292 | 225669 | 2210726 | Santa Teresa               | 2701.86592320  | 5.55 | 5.35 | 6.36 |
| Carucho Chico(2) F.         | 3.292 | 75  | 247009 | 2202337 | 249992 | 2203475 | 248589 | 2202660 | Carucho Chico              | 8285.59546821  | 5.54 | 5.35 | 6.36 |
| El Cerrito(1) F.            | 3.290 | 64  | 318777 | 2200650 | 321691 | 2200051 | 320115 | 2199877 | El Cerrito                 | 2064.89353224  | 5.54 | 5.36 | 6.36 |
| Los Copales(2) F.           | 3.289 | 73  | 243968 | 2206906 | 246951 | 2205980 | 245446 | 2206261 | Los Copales                | 7811.49919065  | 5.54 | 5.35 | 6.36 |
| Tres Reyes(1) F.            | 3.261 | 65  | 230892 | 2203023 | 233255 | 2205216 | 232131 | 2204056 | Tres Reyes (Las Tertillas) | 11102.60027794 | 5.54 | 5.35 | 6.36 |
| Santa Rita F.               | 3.259 | 72  | 310091 | 2223789 | 313235 | 2223893 | 311705 | 2223700 | Santa Rita                 | 2697.25592561  | 5.54 | 5.34 | 6.36 |
| Los Mezquites(1) F.         | 3.258 | 127 | 323864 | 2206543 | 321023 | 2207426 | 322481 | 2207276 | Los Mezquites              | 6674.86630100  | 5.54 | 5.29 | 6.36 |
| Pozo de las Palomas(1) F.   | 3.255 | 83  | 383349 | 2206072 | 386270 | 2204760 | 384781 | 2205305 | Pozo de las Palomas        | 1902.08397361  | 5.54 | 5.33 | 6.36 |
| La Arpita(2) F.             | 3.227 | 95  | 291067 | 2183352 | 294038 | 2184598 | 292544 | 2183989 | La Arpita                  | 3315.57331900  | 5.53 | 5.31 | 6.36 |
| Ziracuárindiro F.           | 3.212 | 80  | 232284 | 2209968 | 235213 | 2211140 | 233735 | 2210593 | Ziracuárindiro             | 6646.69033861  | 5.53 | 5.33 | 6.36 |
| La Joya Grande(1) F.        | 3.188 | 97  | 293345 | 2229167 | 296495 | 2229361 | 294912 | 2229289 | La Joya Grande             | 9252.81159389  | 5.52 | 5.31 | 6.36 |
| San Isidro(1) F.            | 3.183 | 113 | 292515 | 2213749 | 290118 | 2215717 | 291159 | 2214536 | San Isidro                 | 598.75109722   | 5.52 | 5.29 | 6.36 |
| Tacupo(3) F.                | 3.181 | 37  | 240178 | 2194996 | 242948 | 2196539 | 241618 | 2195672 | Tacupo                     | 7101.75768823  | 5.52 | 5.39 | 6.36 |
| Caballerías(3) F.           | 3.180 | 81  | 245027 | 2214798 | 247977 | 2215579 | 246575 | 2214919 | Caballerías                | 8451.11483758  | 5.52 | 5.32 | 6.36 |
| San Jerónimo F.             | 3.149 | 54  | 363098 | 2216068 | 366041 | 2216869 | 364645 | 2216201 | San Jerónimo               | 1234.24317560  | 5.52 | 5.35 | 6.35 |
| Las Cruces F.               | 3.148 | 55  | 258995 | 2199764 | 261443 | 2201632 | 260201 | 2200739 | Las Cruces                 | 3100.69323684  | 5.52 | 5.35 | 6.35 |
| Bosques del Renacimiento F. | 3.116 | 68  | 383715 | 2226924 | 386748 | 2227045 | 385244 | 2227209 | Bosques del Renacimiento   | 3461.07918427  | 5.51 | 5.33 | 6.35 |
| Cruz Blanca(3) F.           | 3.105 | 90  | 388918 | 2205919 | 391948 | 2205254 | 390442 | 2205622 | La Magdalena Cruz Blanca   | 11973.11826733 | 5.51 | 5.30 | 6.35 |
| Ponciano F.                 | 3.092 | 85  | 309756 | 2205452 | 312613 | 2206421 | 311264 | 2205712 | Don Ponciano [Ganadería]   | 3312.19386661  | 5.51 | 5.30 | 6.35 |
| Las Flores(2) F.            | 3.089 | 70  | 269758 | 2215893 | 272668 | 2216371 | 271223 | 2216218 | Las Flores                 | 6737.04886795  | 5.51 | 5.32 | 6.35 |
| Peña Blanca(1) F.           | 3.082 | 39  | 352640 | 2207030 | 355568 | 2207585 | 354154 | 2207163 | Peña Blanca                | 2647.79207421  | 5.51 | 5.37 | 6.35 |
| El Arca de Noé(4) F.        | 3.074 | 85  | 258678 | 2213697 | 261606 | 2213846 | 260160 | 2213546 | El Arca de Noé             | 2711.00836617  | 5.50 | 5.30 | 6.35 |
| Los Pinos F.                | 3.052 | 83  | 313895 | 2201594 | 316787 | 2202260 | 315393 | 2201664 | Los Pinos                  | 1514.06748707  | 5.50 | 5.30 | 6.35 |
| Mexiquillo(6) F.            | 3.038 | 59  | 247646 | 2213317 | 250406 | 2214310 | 249133 | 2213600 | Mexiquillo                 | 8899.55250884  | 5.50 | 5.33 | 6.35 |
| San José F.                 | 3.037 | 72  | 241667 | 2196998 | 244373 | 2198243 | 243042 | 2197561 | San José                   | 13956.97887248 | 5.50 | 5.31 | 6.35 |
| El Comal F.                 | 3.029 | 46  | 279315 | 2225262 | 276509 | 2224290 | 277938 | 2224759 | El Comal                   | 1897.10139273  | 5.50 | 5.35 | 6.35 |
| Las Flores(3) F.            | 3.025 | 105 | 269508 | 2213790 | 272044 | 2215075 | 270625 | 2214746 | Las Flores                 | 5949.50398198  | 5.49 | 5.27 | 6.35 |
| Las Cuatro Milpas(2) F.     | 3.010 | 78  | 215523 | 2213155 | 218222 | 2214302 | 216982 | 2213470 | Las Cuatro Milpas          | 3943.25369238  | 5.49 | 5.30 | 6.34 |
| La Puerta del Agua(2) F.    | 3.008 | 69  | 301499 | 2223273 | 303665 | 2224835 | 302822 | 2223782 | La Puerta del Agua         | 7878.20397169  | 5.49 | 5.31 | 6.34 |
